# Supplementary material for: SETDB1 Is Involved in Postembryonic DNA Methylation and Gene Silencing in Drosophila
Source: PLOS journal article supplement (doi:10.1371/journal.pone.0010581), 2010-05-17
Supplement: S39 (10.1371/journal.pone.0010581.s039) [file journal.pone.0010581.s039]

| **Table S1. DNA oligonucleotides used for PCR and RvT-PCR** | | | | |
| --- | --- | --- | --- | --- |
| **Primer** | **Sequence** | **Position** | | **Reference sequence** |
| Primer pairs for ChIP | | | | |
| *RB*-PDE-5’ | CATCTTTTAATGCCCTCTGCGACG | | 697423-  697445 | NC_004354 |
| *RB*-PDE-3’ | ATGACTCTGCCAAGTGACCTCCAG | | 697052-  697075 | NC_004354 |
| *RB*-Exon-I-5’ | CAGAAAAGGGTGTATCGCGAACAC | | 695145-  695168 | NC_004354 |
| *RB*-Exon-I-3’ | CTTTTAGGCAGGCAATGCACAGAA | | 694551-  694575 | NC_004354 |
| *RB*-PPE-5’ | gcacaatgctatttgcatgtgtgc | | 695957-695932 | NC_004354 |
| *RB*-PPE-3’ | gagaacttgctgtcgcagcacata | | 695756-695733 |
| tetO-TK-LUC-5’ | ACCCGGGTACCGAGCTCG | |  | [69] |
| tetO-TK-LUC-3’ | TTATGTTTTTGGCGTCTTCCATGG | |  |
| *Antp*-5’ | gcattcagacttaaacttgttaaag | | 2827266-2827290 | AE014297.2 |
| *Antp*-3’ | CGTTCACAAAGTAATTTTATTTATG | | 2827705-2827730 |
| *ANTP*-5’ | cacttttagggatggcttccttcat | | 214641-214665 | NC_004353.3 |
| *ANTP*-3’ | CAGATATGCCAAACCAAAAAAGTAG | | 214956-214980 |
| *Rt1b*{}799-5’ | cgggagtgcacggagcgaaagaga | | 4378302-4378325 | NT_033778 |
| *Rt1b*{}799-3’ | CTGCTCACCGAAGTCATACCTTGA | | 4378302-  4378325 |
| Primer pairs for RvT-PCR | | | | |
| RT-*RB*-5’ | CCTAAACGTAACTCCGGACGTGAGTGGCCG | | 2804-  2834 | CG7413  LOCUS:  NM_080297 |
| RT-*RB*-3’ | ATAAAATAGTCGAACGTGCGCCGGAGGGGC | | 3282-  3311 | CG7413  LOCUS:  NM_080297 |
| RT-dSETDB1-5’ | AAAGAGGGATACGAGTCGGAGGTGGAC  CAC | | 2122-  2151 | CG30426  LOCUS BT001309 |
| RT-dSETDB1-3’ | TTAGAGCAGACGAAGGCGGCAATTGGGG | | 2631-  2658 | CG30426  LOCUS BT001309 |

| RT-Dnmt2-5’ | gtttcgagagctcacaggcgcgaaatcagt | | | 362-  391 | CG10692  LOCUS NM_001042890 |
| --- | --- | --- | --- | --- | --- |
| RT-Dnmt2-3’ | gcaacaggtccaagcgttgctgcaaaatct | | | 836-  865 | CG10692  LOCUS NM_001042890 |
| RT-actin5C-5’ | CGTTCTGGACTCCGGCGATGG | | | 581-  601 | CG4027  LOCUS NM_078497 |
| RT-actin5C-3’ | GTACTTGCGCTCTGGCGGGGC | | | 1119-  1139 | CG4027  LOCUS NM_078497 |
| RT-CG2136-5’ | gttgaccggattgcagaaaagtg | | | 241-263 | [NM_166738.1](http://www.ncbi.nlm.nih.gov/nucleotide/24638551) |
| RT-CG2136-3’ | aatactaagaaatgttcgagaaatc | | | 576-600 |
| RT-*Antp*-5’ | gtacaaacaactgcgagagcatga | | | 11-34 | NM_206450.1 |
| RT-*Antp*-3’ | ggcagctgctgcgcatgcagttgctgt | | | 395-419 |
| RT-*Rt1b*/gag-5’ | ATGGCGTAGACAGCGATACCTGGG | | | 2881-2904 | [71] |
| RT-*Rt1b*/gag-3’ | CCTCTATTCTGGTATACAGGATACGTT | | | 3334-3360 |
| Primer pairs for bisulfite sequencing | | | | | |
| 1st-*RB*-PDE-5’ | | TAAGATTGGAATATTTAGTTTAATTGAA | 697542-  697569 | | NC_004354 |
| 1st-*RB*-PDE-3’ | | CCACCTTCTAATCAACTAAATTCATCTC | 696985-  697012 | | NC_004354 |
| 1st-*RB*-Exon-I-5’ | | GATTAAGTTGTGAAATAGTTATTTTGTT | 695273-  695300 | | NC_004354 |
| 1st-*RB*-Exon-I-3’ | | ACACACAATTACCCTTAACCAC | 694445-  694466 | | NC_004354 |
| 2nd-*RB*-PDE-5’ | | TATAAATTTTATATTTAGAAATGAAATG | 697452-  697479 | | NC_004354 |
| 2nd-*RB*-PDE-3’ | | TCCACATCCCCCAATTTCC | 697191-  697209 | | NC_004354 |
| 2nd-*RB*-Exon-I-5’ | | ATTATTTTTGTAATTAAGTGTAAG | 695057-  695080 | | NC_004354 |
| 2nd-*RB*-Exon-I-3’ | | ACCACCTCAACTCCCAATTC | 694778-  694797 | | NC_004354 |
| RT-CG2136-5’ | | gttgaccggattgcagaaaagtg | 241-263 | | [NM_166738.1](http://www.ncbi.nlm.nih.gov/nucleotide/24638551) |
| RT-CG2136-3’ | | aatactaagaaatgttcgagaaatc | 576-600 | |
| RT-*Antp*-5’ | | gtacaaacaactgcgagagcatga | 11-34 | | NM_206450.1 |
| RT-*Antp*-3’ | | ggcagctgctgcgcatgcagttgctgt | 395-419 | |
| RT-*Rt1b*/gag-5’ | | ATGGCGTAGACAGCGATACCTGGG | 2881-2904 | | [71] |
| RT-*Rt1b*/gag-3’ | | CCTCTATTCTGGTATACAGGATACGTT | 3334-3360 | |
| Primer pairs for methylation sensitive restriction assays | | | | | |
| *RB*-PDE-5’ | | CATCTTTTAATGCCCTCTGCGACG | 697423-  697446 | | NC_004354 |
| *RB*-PDE-3’ | | ATGACTCTGCCAAGTGACCTCCAG | 697052-  697075 | | NC_004354 |
| *RB*-Exon-I-5’ | | CAGAAAAGGGTGTATCGCGAACAC | 695145-  695168 | | NC_004354 |
| *RB*-Exon-I-3’ | | CTTTTAGGCAGGCAATGCACAGAA | 694551-  694574 | | NC_004354 |
| Psq-5’ | | AATAAACGCTGCCCTGCTTA | 6498339-  6498358 | | NT_033778 |
| Psq-3’ | | TCGGATCAATCTCCATGACA | 6498868-  6498887 | | NT_033778 |
