# Supplementary material for: SETDB1 Is Involved in Postembryonic DNA Methylation and Gene Silencing in Drosophila
Source: PLOS journal article supplement (doi:10.1371/journal.pone.0010581), 2010-05-17
Supplement: S40 (10.1371/journal.pone.0010581.s040) [file journal.pone.0010581.s040]

| **Table S2. DNA oligonucleotides used for DNA-protein interaction assays** | |
| --- | --- |
| **Name** | **Sequence** |
| 5mCpG-5’ | GATCCGACGACGACGACGA**(5mC)**GACGACGACGACGACGACGATC |
| 5mCpG-3’ | GATCGTCGTCGTCGTCGTCGT**(5mC)**GTCGTCGTCGTCGTCGGATC |
| 5mCpA-5’ | GATCCGACGACGACGACGA**(5mC)**ATGACGACGACGACGACGACGATC |
| 5mCpA-3’ | GATCGTCGTCGTCGTCGTCGT**(5mC)**ATGTCGTCGTCGTCGTCGGATC |
| 5mCpT-5’ | GATCCGACGACGACGACGA**(5mC)**TAGACGACGACGACGACGACGATC |
| 5mCpT-3’ | GATCGTCGTCGTCGTCGTCGT(**5mC**)TAGTCGTCGTCGTCGTCGGATC |
| Tri-5mCpG-5’ | GATCCGACGACGA**(5mC)**GA**(5mC)**GA**(5mC)**GACGACGACGACGACGACGATC |
| Tri-5mCpG-3’ | GATCGTCGTCGTCGTCGTCGT(**5mC**)GT(**5mC**)GT(**5mC**)GTCGTCGTCGGATC |
| Tri-5mCpA-5’ | GATCCGACGACGA**(5mC)**ATGA**(5mC)**ATGA**(5mC)**ATGACGACGACGACGACGACGATC |
| Tri-5mCpA-3’ | GATCGTCGTCGTCGTCGTCGT**(5mC)**ATGT**(5mC)**ATGT**(5mC)**ATGTCGTCGTCGGATC |
| Tri-5mCpT-5’ | GATCCGACGACGA**(5mC)**TAGA**(5mC)**TAGA**(5mC)**TAGACGACGACGACGACGACGATC |
| Tri-5mCpT-3’ | GATCGTCGTCGTCGTCGTCGT(**5mC**)TAGT(**5mC**)TAGT(**5mC**)TAGTCGTCGTCGGATC |
| Mix5mCpT-5’ | GATCCGACGACGA**(5mC)**TAGGTACGGTACGGTACGGTACGAATTCGT**(5mC)**TATAGG  TACGGGTACGGTGAATTCGG**(5mC)**TAGACGACGACGA |
